# Supplementary material
Source: PubMed Central journal article supplement (PMC4313801)
Supplement: pnas.201418680SI.pdf [file pnas.201418680SI.pdf]

# Supporting Information

Youyou et al. 10.1073/pnas.1418680112

## SI Text

**Interjudge Agreement Between Two Human Judges.** For participants rated by two friends, the ratings were summed across judges (i.e., individual ratings were not recorded). Thus, the interjudge agreement was estimated using the following formulas.

Interjudge agreement is expressed as the Pearson product-moment correlation between the ratings of judge 1 and judge 2

$$\text{Corr}(J_1, J_2) = \frac{\text{COV}(J_1, J_2)}{\sqrt{\text{VAR}(J_1) \times \text{VAR}(J_2)}}, \quad \text{[S1]}$$

where  $J_1, J_2$  are ratings of judge 1 and judge 2, respectively. Because

$$\text{VAR}(J_1 + J_2) = \text{VAR}(J_1) + \text{VAR}(J_2) + 2\text{COV}(J_1, J_2), \quad \text{[S2]}$$

the covariance between  $J_1$  and  $J_2$  can be expressed as

$$\text{COV}(J_1, J_2) = \frac{\text{VAR}(J_1 + J_2) - \text{VAR}(J_1) - \text{VAR}(J_2)}{2}. \quad \text{[S3]}$$

By replacing the numerator in Eq. S1 with Eq. S3, the interjudge correlation can be expressed as

$$\text{Corr}(J_1, J_2) = \frac{\text{VAR}(J_1 + J_2) - \text{VAR}(J_1) - \text{VAR}(J_2)}{2\sqrt{\text{VAR}(J_1) \times \text{VAR}(J_2)}}. \quad \text{[S4]}$$

Because ratings are independent, it can be assumed that they have the same variance, therefore

$$\text{Corr}(J_1, J_2) = \frac{\text{VAR}(J_1 + J_2) - 2\text{VAR}(J_1)}{2\sqrt{\text{VAR}(J_1) \times \text{VAR}(J_1)}},$$

or

$$\text{Corr}(J_1, J_2) = \frac{\text{VAR}(J_1 + J_2)}{2\text{VAR}(J_1)} - 1,$$

where  $\text{VAR}(J_1 + J_2)$  can be calculated by taking the variance of the summed ratings, and  $\text{VAR}(J_1)$  can be estimated from a sample of participants who were rated by one judge only.

**Table S1. Self-other agreement for human judges in the current sample or as reported in Connelly and Ones's meta-analysis (1)**

| Context        | $n$   |       |        |        |       | $\rho$ |      |      |      |      | Average |
|----------------|-------|-------|--------|--------|-------|--------|------|------|------|------|---------|
|                | O     | C     | E      | A      | N     | O      | C    | E    | A    | N    |         |
| Current sample |       |       |        |        |       |        |      |      |      |      |         |
| Human          |       |       | 17,622 |        |       | 0.59   | 0.41 | 0.54 | 0.48 | 0.39 | 0.49    |
| Meta-analysis  |       |       |        |        |       |        |      |      |      |      |         |
| Cohabitant     | 2,144 | 3,333 | 3,144  | 2,634  | 2,777 | 0.47   | 0.51 | 0.48 | 0.34 | 0.40 | 0.45    |
| Work colleague | 1,396 | 1,647 | 1,647  | 1,647  | 981   | 0.27   | 0.24 | 0.30 | 0.31 | 0.18 | 0.27    |
| Friend         | 7,388 | 9,935 | 11,418 | 10,225 | 9659  | 0.47   | 0.49 | 0.50 | 0.37 | 0.40 | 0.45    |
| Spouse         | 2,429 | 2,957 | 3,331  | 3,023  | 3,439 | 0.60   | 0.63 | 0.64 | 0.54 | 0.53 | 0.58    |
| Family         | 1,186 | 1,796 | 3,102  | 1,515  | 3,065 | 0.48   | 0.50 | 0.57 | 0.37 | 0.51 | 0.50    |

Self-other agreement across the five traits was averaged using Fisher's  $r$ -to- $z$  transformation and weighted by sample-size. The corrected average self-other correlations ( $\rho$ ) are used to plot Fig. 2. A cohabitant is a roommate or a housemate; a work colleague is a supervisor, a coworker, or a subordinate; different from the original grouping in the meta-analysis, a friend can be a best friend, a close acquaintance, or a peer at school (dating partners in the original group were removed); a spouse now includes a married or dating partner; a family member includes a parent or a sibling (spouses in the original group were removed). All correlations were significant at  $P < 0.001$ . A, agreeableness; C, conscientiousness; E, extraversion; N, neuroticism;  $n$ , sample sizes; O, openness;  $\rho$ , self-other correlations corrected for attenuation for self and others' ratings using Cronbach's  $\alpha$  reliability in the current sample and test-retest reliability in the meta-analysis.

1. Connelly BS, Ones DS (2010) An other perspective on personality: meta-analytic integration of observers' accuracy and predictive validity. *Psychol Bull* 136(6):1092–1122.

**Table S2. Zero-order and partial correlations between self-ratings, human judgments, and computer judgments for a subsample of participants ( $n = 1,919$ ), for whom both human and computer judgments were available**

| Correlations                | $r$  |      |                    |                    |      | $\rho$ |      |                    |                    |      |
|-----------------------------|------|------|--------------------|--------------------|------|--------|------|--------------------|--------------------|------|
|                             | O    | C    | E                  | A                  | N    | O      | C    | E                  | A                  | N    |
| Human-computer (zero-order) | 0.22 | 0.17 | 0.20               | 0.14               | 0.19 | 0.41   | 0.24 | 0.29               | 0.21               | 0.25 |
| Human-computer (partial)    | 0.08 | 0.07 | 0.04 <sup>NS</sup> | 0.03 <sup>NS</sup> | 0.08 | 0.11   | 0.09 | 0.04 <sup>NS</sup> | 0.01 <sup>NS</sup> | 0.10 |
| Self-human (zero-order)     | 0.30 | 0.26 | 0.37               | 0.29               | 0.29 | 0.61   | 0.39 | 0.55               | 0.49               | 0.40 |
| Self-human (partial)        | 0.22 | 0.21 | 0.32               | 0.26               | 0.24 | 0.50   | 0.32 | 0.49               | 0.45               | 0.34 |
| Self-computer (zero-order)  | 0.51 | 0.42 | 0.45               | 0.38               | 0.40 | 0.56   | 0.44 | 0.47               | 0.41               | 0.41 |
| Self-computer (partial)     | 0.48 | 0.40 | 0.42               | 0.36               | 0.36 | 0.43   | 0.39 | 0.39               | 0.36               | 0.35 |

All correlations were significant at  $P < 0.01$ , unless otherwise stated. NS, not significant;  $r$ , raw correlations;  $\rho$ , correlations corrected for attenuation for self and humans' ratings using Cronbach's  $\alpha$  reliability.

**Table S3. Summary of the external behaviors, behaviorally related traits, or life outcomes used in the study**

| Variables               | Scales or sources                                                                                                                                                                                                                    | Past findings |
|-------------------------|--------------------------------------------------------------------------------------------------------------------------------------------------------------------------------------------------------------------------------------|---------------|
| Network size            | Number of Facebook friends                                                                                                                                                                                                           | (1)           |
| Network characteristics | Facebook network 1) betweenness, 2) density, 3) transitivity, and 4) brokerage                                                                                                                                                       | (2)           |
| Facebook activities     | Number of Facebook 1) status posts, 2) picture tags, 3) events, and 4) groups                                                                                                                                                        | (1)           |
| Self-monitoring         | Self-Monitoring Scale, a 25-item scale assessing the degree to which one regulates self-presentation using situational cues (3)                                                                                                      | (4)           |
| Impulsivity             | Barratt Impulsiveness Scale (BIS-11), a 30-item scale assessing general and specific dimensions of impulsiveness (5)                                                                                                                 | (6, 7)        |
| Sensational interests   | The Sensational Interests Questionnaire, assessing 1) wholesome interests, 2) intellectual activities, 3) violent occultism, 4) militarism, and 5) credulousness (8)                                                                 | (7, 8)        |
| Life satisfaction       | Satisfaction with Life Scale, a five-item scale assessing life satisfaction (9)                                                                                                                                                      | (10)          |
| Depression              | Centre for Epidemiological Study Depression Scale (CES-D) (11)                                                                                                                                                                       | (12)          |
| Substance use           | Questionnaire assessing 1) alcohol consumption, 2) smoking behavior, and 3) drug use                                                                                                                                                 | (13–15)       |
| Physical health         | Pennebaker Inventory of Limbic Languidness (16), an inventory of respondents' 1) experience of common physical symptoms, 2) recent days sick, 3) recent physician visits, and 4) recent days restricted due to illness               | (17, 18)      |
| Values                  | Schwartz's Values Survey, assessing 10 types of universal values, including 1) achievement, 2) benevolence, 3) conformity, 4) hedonism, 5) power, 6) security, 7) self-direction, 8) stimulation, 9) tradition, and 10) universalism | (19, 20)      |
| Political attitude      | Facebook profile information indicating political views of Conservative or Liberal                                                                                                                                                   | (21–24)       |
| Field of study          | Facebook profile information indicating university major: 1) arts, 2) sciences, or 3) humanities                                                                                                                                     | (25)          |

Past findings show references of how the variable relates to the Big Five personality traits.

- Amichai-Hamburger Y, Vinitzky G (2010) Social network use and personality. *Comput Human Behav* 26(6):1289–1295.
- Lönnqvist J-E, Itkonen JVA, Verkasalo M, Poutvaara P (2014) The five-factor model of personality and degree and transitivity of Facebook social networks. *J Res Pers* 50(1):98–101.
- Lennox RD, Wolfe RN (1984) Revision of the self-monitoring scale. *J Pers Soc Psychol* 46(6):1349–1364.
- Barrick MR, Parks L, Mount MK (2005) Self-monitoring as a moderator of the relationships between personality traits and performance. *Person Psychol* 58(3):745–767.
- Patton JH, Stanford MS, Barratt ES (1995) Factor structure of the Barratt impulsiveness scale. *J Clin Psychol* 51(6):768–774.
- Miller J, Flory K, Lynam D, Leukefeld C (2003) A test of the four-factor model of impulsivity-related traits. *Pers Individ Dif* 34(8):1403–1418.
- Whiteside SP, Lynam DR (2001) The five factor model and impulsivity: using a structural model of personality to understand impulsivity. *Pers Individ Dif* 30(4):669–689.
- Egan V, et al. (1999) Sensational interests and general personality traits. *J Forensic Psychiatry* 10(3):567–582.
- Diener E, Emmons RA, Larsen RJ, Griffin S (1985) The satisfaction with life scale. *J Pers Assess* 49(1):71–75.
- Schimmack U, Radhakrishnan P, Oishi S, Dzokoto V, Ahadi S (2002) Culture, personality, and subjective well-being: integrating process models of life satisfaction. *J Pers Soc Psychol* 82(4):582–593.
- Radloff LS (1977) The CES-D scale: A self-report depression scale for research in the general. *Appl Psychol Meas* 1(3):385–401.
- Trull TJ, Sher KJ (1994) Relationship between the five-factor model of personality and Axis I disorders in a nonclinical sample. *J Abnorm Psychol* 103(2):350–360.
- Merenäkk L, et al. (2003) Association between substance use, personality traits, and platelet MAO activity in preadolescents and adolescents. *Addict Behav* 28(8):1507–1514.
- Kubicka L, Matejcek Z, Dytrych Z, Roth Z (2001) IQ and personality traits assessed in childhood as predictors of drinking and smoking behaviour in middle-aged adults: a 24-year follow-up study. *Addiction* 96(11):1615–1628.
- Kotov R, Gamez W, Schmidt F, Watson D (2010) Linking “big” personality traits to anxiety, depressive, and substance use disorders: a meta-analysis. *Psychol Bull* 136(5):768–821.
- Pennebaker J (1982) *The PILL: A Trait Measure. The Psychology of Physical Symptoms* (Springer, New York), pp 169–170.
- Miller TQ, Smith TW, Turner CW, Guijarro ML, Hallett AJ (1996) A meta-analytic review of research on hostility and physical health. *Psychol Bull* 119(2):322–348.
- Smith TW, Spiro A (2002) Personality, health, and aging: Prolegomenon for the next generation. *J Res Pers* 36(4):363–394.
- Bilsky W, Schwartz S (1994) Values and personality. *Eur J Pers* 8(3):163–181.
- Roccas S, Sagiv L, Schwartz SH, Knafo A (2002) The big five personality factors and personal values. *Pers Soc Psychol Bull* 28(6):789–801.
- Vittorio G, Schwartz S, Capanna C, Vecchione M, Caprara GV (2010) Personality and politics: Values, traits, and political choice. *Polit Psychol* 27(1):1–28.
- Jost JT, Nosek BA, Gosling SD (2008) Ideology: Its resurgence in social, personality, and political psychology. *Perspect Psychol Sci* 3(2):126–136.
- Carney DR, Jost JT, Gosling SD, Potter J (2008) The secret lives of liberals and conservatives: personality profiles, interaction styles, and the things they leave behind. *Polit Psychol* 29(6):807–840.
- Russett B (1997) The classical liberals were right: democracy, interdependence, and conflict 1950 – 1985. *Int Stud Q* 41(2):267–293.
- Goldschmid ML (1967) Prediction of college majors by personality tests. *J Couns Psychol* 14(4):302–308.

**Table S4. External validity of personality judgments**

| Variables                              | Variable type | <i>r</i> /AUC |                    |                    | <i>n</i> |          |        |
|----------------------------------------|---------------|---------------|--------------------|--------------------|----------|----------|--------|
|                                        |               | Self          | Computer           | Human              | Self     | Computer | Human  |
| Network size                           | CONT          | 0.23          | 0.24               | 0.17               | 11,587   | 5,443    | 829    |
| Network characteristics                |               | 0.14          | 0.14               | 0.13               | 11,587   | 5,443    | 829    |
| Betweenness                            | CONT          | 0.19          | 0.21               | 0.14 <sup>NS</sup> |          |          |        |
| Density                                | CONT          | 0.05          | 0.04 <sup>NS</sup> | 0.12 <sup>NS</sup> |          |          |        |
| Transitivity                           | CONT          | 0.13          | 0.08               | 0.13               |          |          |        |
| Brokerage                              | CONT          | 0.19          | 0.21               | 0.14               |          |          |        |
| Social network activities              |               | 0.06          | 0.16               | 0.03               |          |          |        |
| Number of status posts                 | LOG           | 0.16          | 0.20               | 0.05 <sup>NS</sup> | 25,853   | 11,806   | 1,287  |
| Number of picture tags                 | LOG           | 0.02          | 0.11               | 0.03 <sup>NS</sup> | 168,925  | 27,115   | 11,649 |
| Number of groups                       | LOG           | 0.16          | 0.20               | 0.05 <sup>NS</sup> | 35,368   | 17,909   | 1,918  |
| Number of events                       | LOG           | 0.09          | 0.14               | 0.04 <sup>NS</sup> | 3,784    | 1,804    | 292    |
| Self-monitoring                        | DICH          | 0.40          | 0.23               | 0.19               | 18,990   | 3,545    | 4,280  |
| Sensational interests                  |               | 0.32          | 0.29               | 0.16               | 75,787   | 9,566    | 17,794 |
| Wholesome interests                    | CONT          | 0.30          | 0.26               | 0.12               |          |          |        |
| Intellectual activities                | CONT          | 0.49          | 0.32               | 0.21               |          |          |        |
| Violent occultism                      | CONT          | 0.29          | 0.29               | 0.18               |          |          |        |
| Militarism                             | CONT          | 0.25          | 0.33               | 0.15               |          |          |        |
| Credulousness                          | CONT          | 0.28          | 0.27               | 0.14               |          |          |        |
| Impulsivity                            | CONT          | 0.52          | 0.28               | 0.26               | 5,935    | 1,382    | 1,211  |
| Life satisfaction                      | CONT          | 0.52          | 0.22               | 0.24               | 51,734   | 6,291    | 13,053 |
| Depression                             | CONT          | 0.37          | 0.30               | 0.24               | 2,422    | 761      | 562    |
| Substance use                          |               | 0.09          | 0.16               | 0.09               | 7,438    | 2,027    | 1,759  |
| Smoking                                | CONT          | 0.12          | 0.19               | 0.11               |          |          |        |
| Alcohol consumption                    | CONT          | 0.11          | 0.20               | 0.08 <sup>NS</sup> |          |          |        |
| Drug use                               | CONT          | 0.05          | 0.10               | 0.08 <sup>NS</sup> |          |          |        |
| Physical health                        |               | 0.26          | 0.20               | 0.12               |          |          |        |
| Recent physician visits                | LOG           | 0.16          | 0.15               | 0.04 <sup>NS</sup> | 8,005    | 2,065    | 1,875  |
| Recent days sick                       | LOG           | 0.19          | 0.17               | 0.10               | 7,945    | 2,052    | 1,872  |
| Experience of common physical symptoms | LOG           | 0.42          | 0.27               | 0.20               | 9,244    | 2,285    | 2,138  |
| Days of restricted activity            | LOG           | 0.20          | 0.20               | 0.10               | 7,924    | 2,049    | 1,870  |
| Values                                 |               | 0.16          | 0.14               | 0.07               | 5,595    | 1,627    | 1,113  |
| Conformity                             | CONT          | 0.16          | 0.11               | 0.03 <sup>NS</sup> |          |          |        |
| Tradition                              | CONT          | 0.14          | 0.17               | 0.04 <sup>NS</sup> |          |          |        |
| Benevolence                            | CONT          | 0.13          | 0.13               | 0.02 <sup>NS</sup> |          |          |        |
| Universalism                           | CONT          | 0.20          | 0.23               | 0.08 <sup>NS</sup> |          |          |        |
| Self-direction                         | CONT          | 0.15          | 0.16               | 0.07 <sup>NS</sup> |          |          |        |
| Stimulation                            | CONT          | 0.21          | 0.19               | 0.12 <sup>NS</sup> |          |          |        |
| Hedonism                               | CONT          | 0.11          | 0.13               | 0.12               |          |          |        |
| Achievement                            | CONT          | 0.12          | 0.04 <sup>NS</sup> | 0.08 <sup>NS</sup> |          |          |        |
| Power                                  | CONT          | 0.26          | 0.17               | 0.15               |          |          |        |
| Security                               | CONT          | 0.11          | 0.03 <sup>NS</sup> | 0.03 <sup>NS</sup> |          |          |        |
| Field of study                         |               | 0.60          | 0.62               | 0.58               | 2,845    | 1,827    | 208    |
| Arts                                   | DICH          | 0.58          | 0.56               | 0.55               |          |          |        |
| Business                               | DICH          | 0.62          | 0.65               | 0.60               |          |          |        |
| Science                                | DICH          | 0.60          | 0.64               | 0.57               |          |          |        |
| Political attitude                     | DICH          | 0.63          | 0.63               | 0.57               | 19,043   | 5,037    | 1,335  |

External validity for continuous compound variables were averaged using Fisher's *r*-to-*z* transformation and weighted by sample size. The average external validity for dichotomous compound variable was calculated using the average AUC. CONT, continuous variable; DICH, dichotomous variable; LOG, continuous and log-transformed variable; NS, not significant; all correlations were significant at  $P < 0.05$ , unless otherwise stated.
